# Supplementary material for: Mini-EmulsionFabricated Magnetic and Fluorescent Hybrid Janus Micro-Motors
Source: MDPI journal article supplement (doi:10.3390/mi9020083), 2018-02-15
Supplement: s1 [file s1]

# Supplementary Materials: Mini-Emulsion-Fabricated Magnetic and Fluorescent Hybrid Janus Micro-Motors

Jiapu Jiao, Dandan Xu, Yuhuan Liu, Weiwei Zhao, Jiaheng Zhang, Tingting Zheng, Huanhuan Feng and Xing Ma

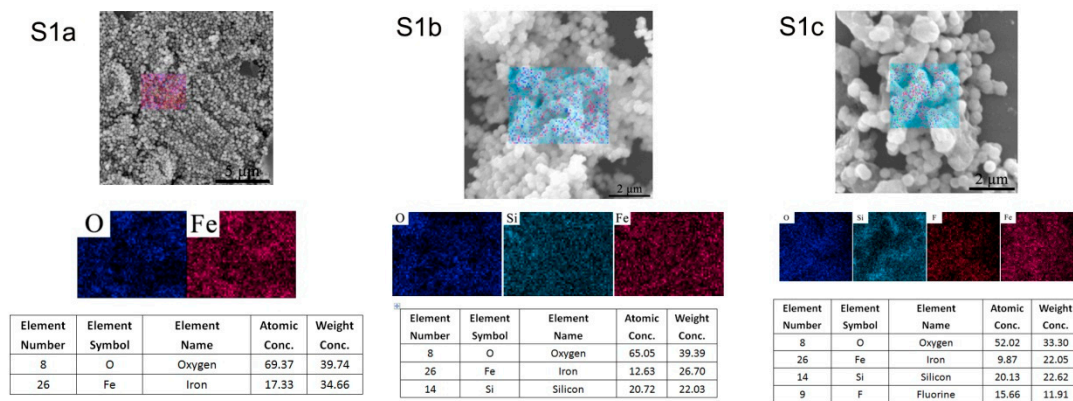

**Figure S1.** Energy-dispersive X-ray spectroscopy (EDS) of Fe<sub>3</sub>O<sub>4</sub> (S1a), Fe<sub>3</sub>O<sub>4</sub>@SiO<sub>2</sub> (S1b) and fluorosilane surface modification Fe<sub>3</sub>O<sub>4</sub>@SiO<sub>2</sub> (S1c).

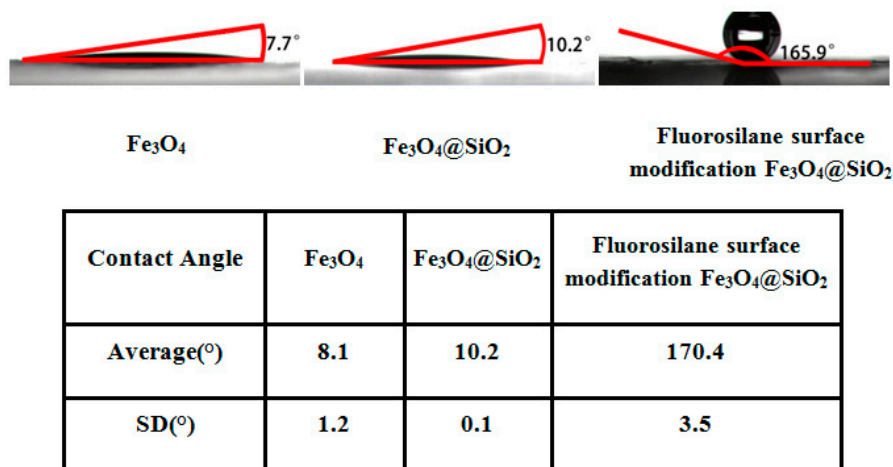

**Figure S2.** Contact angle measurement of Fe<sub>3</sub>O<sub>4</sub>, Fe<sub>3</sub>O<sub>4</sub>@SiO<sub>2</sub> and fluorosilane surface modification Fe<sub>3</sub>O<sub>4</sub>@SiO<sub>2</sub> in photos and tables.

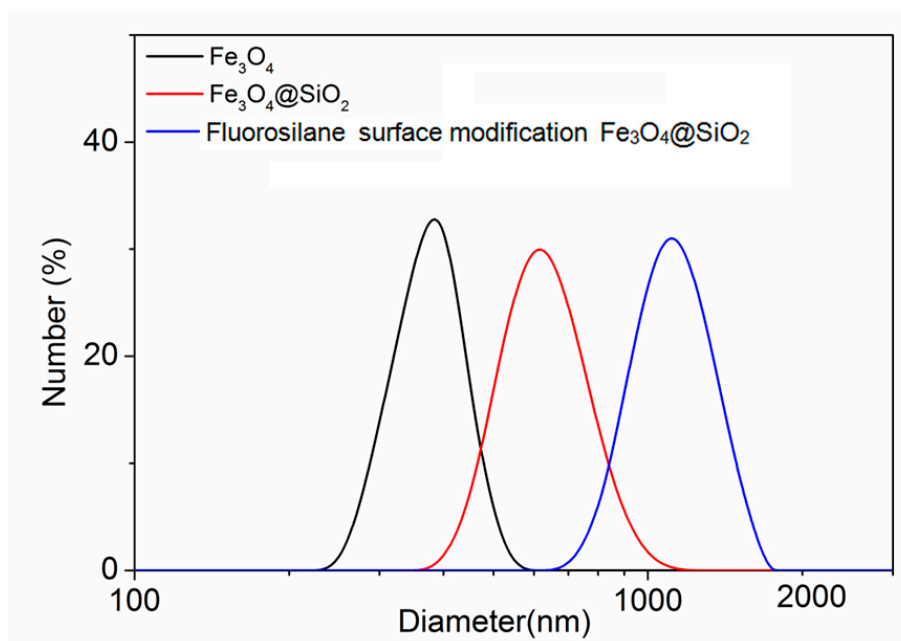

**Figure S3.** Size distribution of  $\text{Fe}_3\text{O}_4$ ,  $\text{Fe}_3\text{O}_4@\text{SiO}_2$  and fluorosilane surface modification  $\text{Fe}_3\text{O}_4@\text{SiO}_2$  by dynamic light scattering measurement.

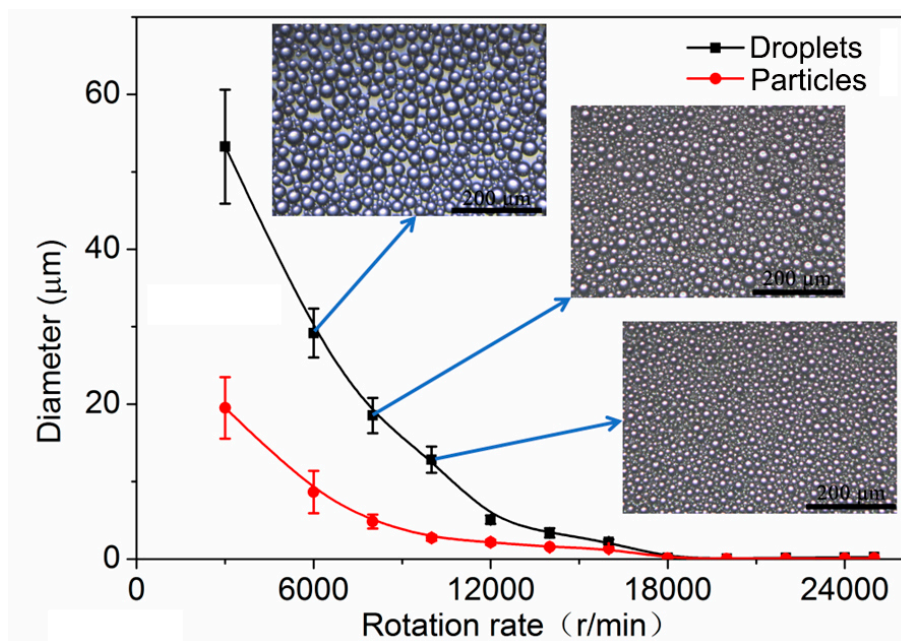

**Figure S4.** The relationship between size and rotation speed.

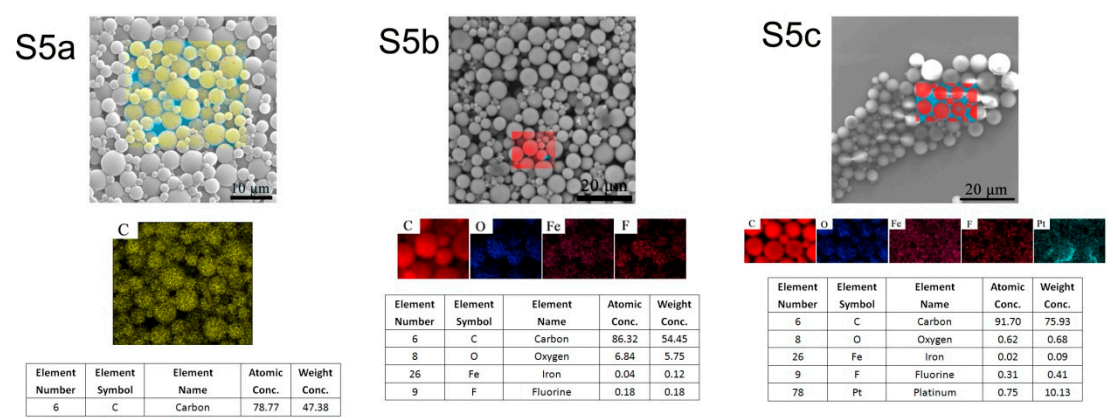

**Figure S5.** Energy-dispersive X-ray spectroscopy (EDS) of Polystyrene micro particles (S5a), magnetic PS micro particle (S5b) and platinum coated magnetic PS micro particles (S5c).
